# Supplementary material for: Cannabis Influences the Putative Cytokines-Related Pathway of Epilepsy among Egyptian Epileptic Patients
Source: MDPI journal article supplement (doi:10.3390/brainsci9120332), 2019-11-20
Supplement: s1 [file s1]

## Supplementary Tables

In the current study, three variables could possibly affect the cytokines levels; sex, type of therapy and/or cannabis. Therefore, we conducted three comparisons to avoid the potential confounders:

First comparison of the cytokines' levels among the "epileptic patients on monotherapy/ Na-valproate" (n=119) as regard cannabis use which as confounding factor was distributed unequally among those patients. This comparison was used to avoid the confounding effect of the AEDs. This resulted in statistically significant differences in all inflammatory cytokines except IL-1 $\beta$ , IL-10 and IL-10. This denotes that cannabis display real effect on the inflammatory cytokines among epileptic patients.

**Table S1:** Comparison of the mean serum cytokine levels and mRNA gene expression profile among patients on monotherapy (using Na-valproate) (n=119) as regard cannabis use.

| Serum and mRNA Cytokines levels | Epilepsy+Cannabis (n=53) | Epilepsy only (Non-cannabis)(n=66) | p-value |
|---------------------------------|--------------------------|------------------------------------|---------|
| IL-1 $\alpha$ (pg/ml)           | 10.8 $\pm$ 5.5           | 22.9 $\pm$ 9.2                     | 0.003   |
| IL-1 $\beta$ (pg/ml)            | 28.2 $\pm$ 9.7           | 29.6 $\pm$ 12.1                    | 0.19    |
| IL-2 (pg/ml)                    | 17.2 $\pm$ 6.9           | 40.8 $\pm$ 11.9                    | 0.0001  |
| IL-4 (pg/ml)                    | 13.7 $\pm$ 5.3           | 14.1 $\pm$ 5.4                     | 0.571   |
| IL-6 (pg/ml)                    | 17.2 $\pm$ 6.9           | 42.9 $\pm$ 13.2                    | 0.0001  |
| IL-8(pg/ml)                     | 21.3 $\pm$ 8.7           | 44.6 $\pm$ 14.4                    | 0.0001  |
| IL-10 (pg/ml)                   | 23.6 $\pm$ 6.2           | 14.3 $\pm$ 4.8                     | 0.297   |
| TNF $\alpha$ (pg/ml)            | 68.8 $\pm$ 15.9          | 128.9 $\pm$ 29                     | 0.005   |
| IL-1 $\alpha$ mRNA (R)          | 2.2 $\pm$ 1.1            | 2.6 $\pm$ 1.3                      | 0.02    |
| IL-1 $\beta$ mRNA (R)           | 2.2 $\pm$ 0.9            | 2.7 $\pm$ 1.3                      | 0.007   |
| IL-2 mRNA (R)                   | 2.4 $\pm$ 1.1            | 2.7 $\pm$ 1.3                      | 0.03    |
| IL-6 mRNA (R)                   | 2.2 $\pm$ 1.1            | 2.6 $\pm$ 1.3                      | 0.02    |
| IL-8 mRNA (R)                   | 2.1 $\pm$ 0.8            | 3.1 $\pm$ 1.3                      | 0.001   |
| IL-10 mRNA (R)                  | 1.4 $\pm$ 0.9            | 1.1 $\pm$ 0.3                      | 0.001   |
| TNF $\alpha$ mRNA (R)           | 2.1 $\pm$ 0.8            | 3.1 $\pm$ 1.3                      | 0.001   |

Second comparison was to test the effect of AEDs in our studied population sample and in this case, to avoid the confounding effect of cannabis. We analyzed the differences in the cytokines' levels between monotherapy and polytherapy among "Epilepsy+Cannabis" however, no significant differences were detected.

**Table S2:** Comparison of the mean serum cytokine levels and mRNA gene expression profile among epileptic patients using cannabis "Epilepsy+Cannabis" (n=165) as regard AEDs.

| Serum and mRNA Cytokines levels | Monotherapy (n=53) | Polytherapy (n=112) | p-value |
|---------------------------------|--------------------|---------------------|---------|
| IL-1 $\alpha$ (pg/ml)           | 10.8 $\pm$ 5.5     | 12.9 $\pm$ 5.7      | 0.933   |
| IL-1 $\beta$ (pg/ml)            | 28.2 $\pm$ 9.7     | 28.9 $\pm$ 9.2      | 0.531   |
| IL-2 (pg/ml)                    | 17.2 $\pm$ 6.9     | 17.9 $\pm$ 6.7      | 0.944   |
| IL-4 (pg/ml)                    | 13.7 $\pm$ 5.3     | 13.7 $\pm$ 4.9      | 0.951   |
| IL-6 (pg/ml)                    | 17.2 $\pm$ 6.9     | 18.1 $\pm$ 6.7      | 0.904   |
| IL-8(pg/ml)                     | 21.3 $\pm$ 8.7     | 21.4 $\pm$ 7.1      | 0.113   |
| IL-10 (pg/ml)                   | 23.6 $\pm$ 6.2     | 25.1 $\pm$ 7.3      | 0.128   |
| TNF $\alpha$ (pg/ml)            | 68.8 $\pm$ 15.9    | 73.4 $\pm$ 15.1     | 0.436   |
| IL-1 $\alpha$ mRNA (R)          | 2.2 $\pm$ 1.1      | 2.1 $\pm$ 0.9       | 0.728   |
| IL-1 $\beta$ mRNA (R)           | 2.2 $\pm$ 0.9      | 2.1 $\pm$ 0.9       | 0.654   |
| IL-2 mRNA (R)                   | 2.2 $\pm$ 1.1      | 2.1 $\pm$ 1         | 0.599   |
| IL-6 mRNA (R)                   | 2.2 $\pm$ 1        | 2.1 $\pm$ 0.9       | 0.708   |
| IL-8 mRNA (R)                   | 2.1 $\pm$ 0.8      | 2.1 $\pm$ 0.9       | 0.174   |
| IL-10 mRNA (R)                  | 1.4 $\pm$ 0.9      | 1.4 $\pm$ 0.8       | 0.653   |
| TNF $\alpha$ mRNA (R)           | 2.1 $\pm$ 0.8      | 2.1 $\pm$ 0.9       | 0.185   |

Third comparison was to avoid the confounding effect of sex. We analyzed the differences in the cytokines' levels once among the whole studied epileptic patients and then among epileptic patients using cannabis and on monotherapy.

**Table S3:** Comparison of the mean serum cytokine levels and mRNA gene expression profile among epileptic patients (n=440) as regard sex.

|                        | Male            | Females         | p-value |
|------------------------|-----------------|-----------------|---------|
| IL-1 $\alpha$ (pg/ml)  | 14.1 $\pm$ 9.6  | 13.3 $\pm$ 9.8  | 0.743   |
| IL-1 $\beta$ (pg/ml)   | 21.8 $\pm$ 15.3 | 22.3 $\pm$ 15.9 | 0.376   |
| IL-2 (pg/ml)           | 24.2 $\pm$ 16.9 | 23 $\pm$ 16.6   | 0.431   |
| IL-4 (pg/ml)           | 14.1 $\pm$ 4.9  | 14.1 $\pm$ 5.1  | 0.647   |
| IL-6 (pg/ml)           | 25.2 $\pm$ 18.4 | 24.8 $\pm$ 19.5 | 0.454   |
| IL-8 (pg/ml)           | 32.5 $\pm$ 15.1 | 32.3 $\pm$ 15.2 | 0.832   |
| IL-10 (pg/ml)          | 25.4 $\pm$ 15.3 | 26.6 $\pm$ 15.4 | 0.939   |
| TNF- $\alpha$ (pg/ml)  | 83.2 $\pm$ 43.3 | 82.3 $\pm$ 45.1 | 0.270   |
| IL-1 $\alpha$ mRNA (R) | 2.2 $\pm$ 1.3   | 2.1 $\pm$ 1.4   | 0.611   |
| IL-1 $\beta$ mRNA (R)  | 2.2 $\pm$ 1.3   | 2.1 $\pm$ 1.4   | 0.467   |
| IL-2 mRNA (R)          | 2.2 $\pm$ 1.3   | 2.1 $\pm$ 1.4   | 0.528   |
| IL-6 mRNA (R)          | 2.2 $\pm$ 1.4   | 2.1 $\pm$ 1.4   | 0.691   |
| IL-8 mRNA (R)          | 2.1 $\pm$ 1.1   | 2.1 $\pm$ 1.3   | 0.211   |
| IL-10 mRNA (R)         | 1.7 $\pm$ 1.1   | 1.7 $\pm$ 1.2   | 0.314   |
| TNF- $\alpha$ mRNA (R) | 2.1 $\pm$ 1.2   | 2.1 $\pm$ 1.2   | 0.305   |

**Table S4:** Comparison of the mean serum cytokine levels and mRNA gene expression profile among epileptic patients using cannabis and on monotherapy (n=53) as regard sex.

|                        | Male            | Females         | p-value |
|------------------------|-----------------|-----------------|---------|
| IL-1 $\alpha$ (pg/ml)  | 11.6 $\pm$ 4.8  | 10.1 $\pm$ 6.2  | 0.071   |
| IL-1 $\beta$ (pg/ml)   | 28.1 $\pm$ 10.2 | 28.4 $\pm$ 9.3  | 0.734   |
| IL-2 (pg/ml)           | 16.8 $\pm$ 6.1  | 17.6 $\pm$ 7.6  | 0.114   |
| IL-4 (pg/ml)           | 15.1 $\pm$ 5.2  | 12.1 $\pm$ 5.2  | 0.394   |
| IL-6 (pg/ml)           | 16.8 $\pm$ 6.1  | 17.6 $\pm$ 7.6  | 0.114   |
| IL-8 (pg/ml)           | 20.5 $\pm$ 8.5  | 22.1 $\pm$ 8.9  | 0.431   |
| IL-10 (pg/ml)          | 23.9 $\pm$ 7.1  | 23.2 $\pm$ 5.2  | 0.354   |
| TNF- $\alpha$ (pg/ml)  | 70.9 $\pm$ 14.2 | 66.7 $\pm$ 17.5 | 0.292   |
| IL-1 $\alpha$ mRNA (R) | 2.3 $\pm$ 0.9   | 2.1 $\pm$ 1.1   | 0.556   |
| IL-1 $\beta$ mRNA (R)  | 2.3 $\pm$ 0.9   | 2.1 $\pm$ 1.1   | 0.556   |
| IL-2 mRNA (R)          | 2.3 $\pm$ 0.9   | 2.1 $\pm$ 1.1   | 0.648   |
| IL-6 mRNA (R)          | 2.3 $\pm$ 0.9   | 2.1 $\pm$ 1.1   | 0.556   |
| IL-8 mRNA (R)          | 2.1 $\pm$ 0.7   | 2.1 $\pm$ 0.9   | 0.167   |
| IL-10 mRNA (R)         | 1.4 $\pm$ 0.8   | 1.4 $\pm$ 0.9   | 0.579   |
| TNF- $\alpha$ mRNA (R) | 1.9 $\pm$ 0.7   | 2.1 $\pm$ 0.9   | 0.132   |
